# Supplementary material for: Cancer-specific glycosylation of CD13 impacts its detection and activity in preclinical cancer tissues
Source: iScience. 2023 Oct 16;26(11):108219. doi: 10.1016/j.isci.2023.108219 (PMC10628746; doi:10.1016/j.isci.2023.108219)
Supplement: Document S1. Figures S1–S5 and Table S1 [file mmc1.pdf]

## **Supplemental information**

### **Cancer-specific glycosylation of CD13 impacts its detection and activity in preclinical cancer tissues**

**Francis M. Barnieh, Sebastian P. Galuska, Paul M. Loadman, Simon Ward, Robert A. Falconer, and Sherif F. El-Khamisy**

## Supplementary Information

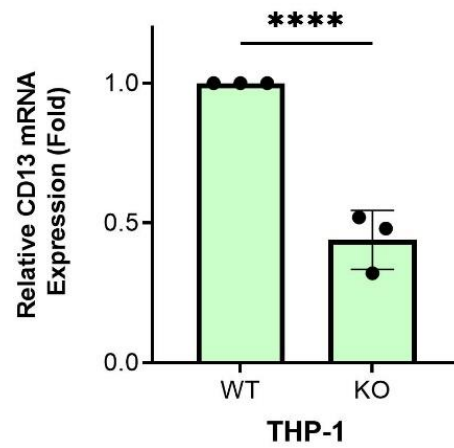

**Fig. S1.** CD13 mRNA expression in CD13-CRISPR knockout THP-1 cells relative to expression in THP-1 wildtype cells

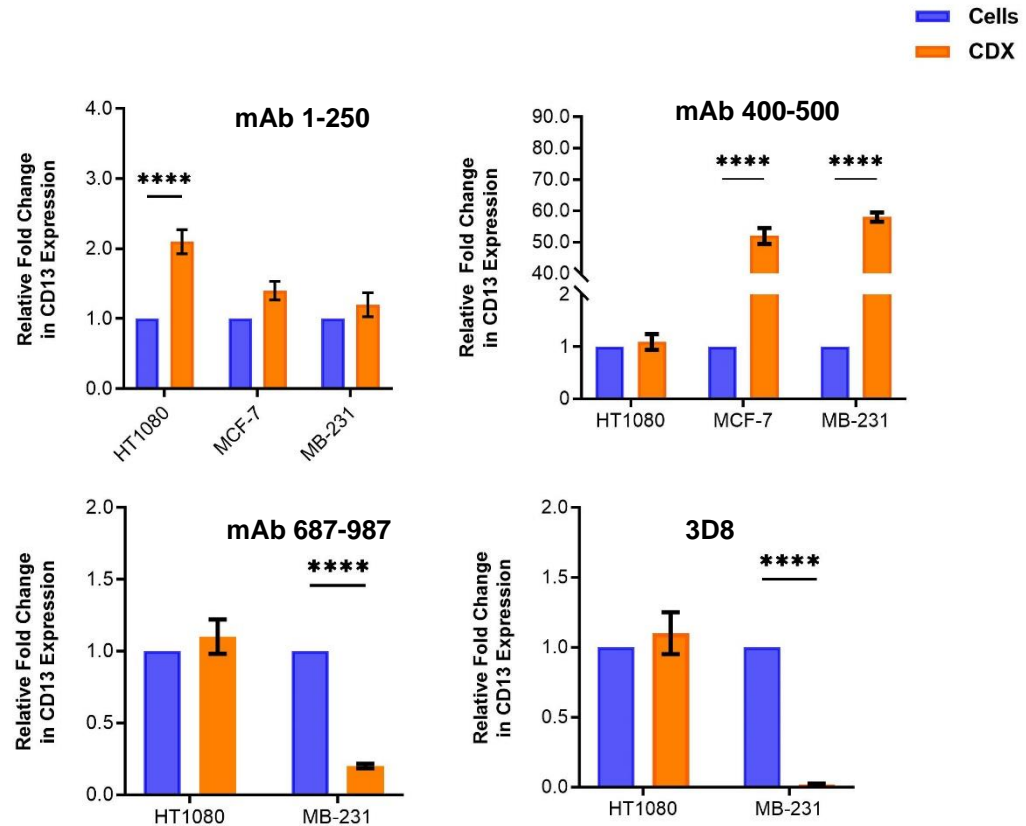

**Figure S2.** Quantified fold-change of CD13 protein expression in tumour xenograft relative to expression in their relative cell lines using different epitope-binding anti-CD13 antibodies. Mean fold-change in protein band intensity was measured using Image Lab Software 6.1 and normalised to a  $\beta$ -actin loading control.

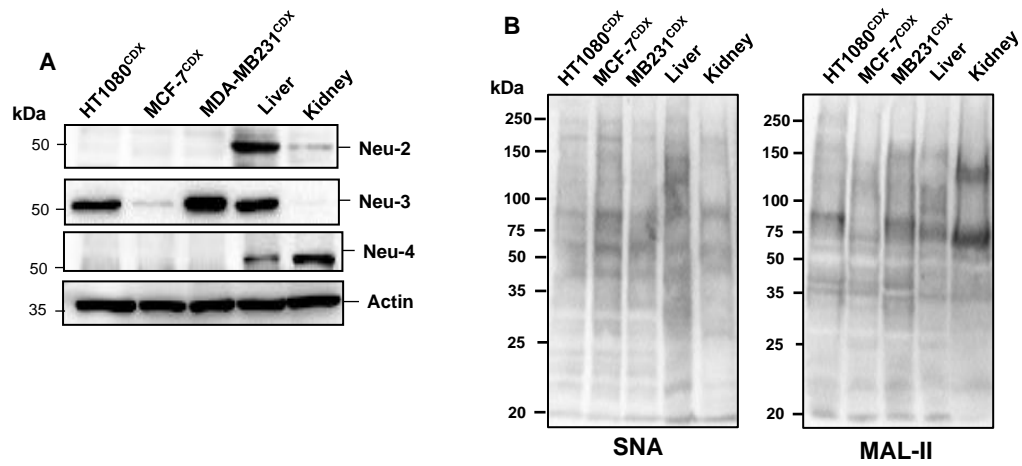

**Figure S3.** Expression of neuraminidases and sialo-glycans in CDX and normal tissues (A) Differential expression of neuraminidases in tumour xenografts and normal tissues. (B) SNA and MAL-II lectin blot of tumour xenograft and normal tissues, to assess their binding affinity to  $\alpha$ 2,3 and  $\alpha$ 2,6 sialo-glycans respectively.

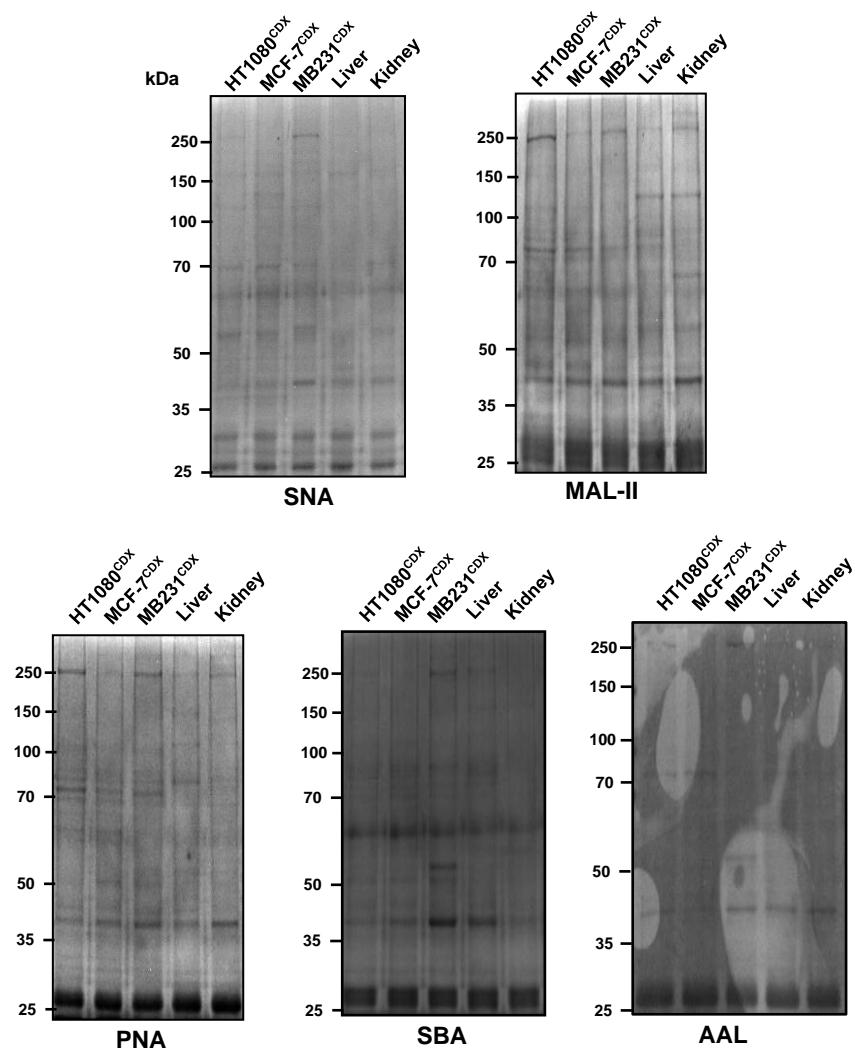

**Figure S4.** Coomassie staining of lectin affinity captured proteins in tumour xenograft and normal tissues.

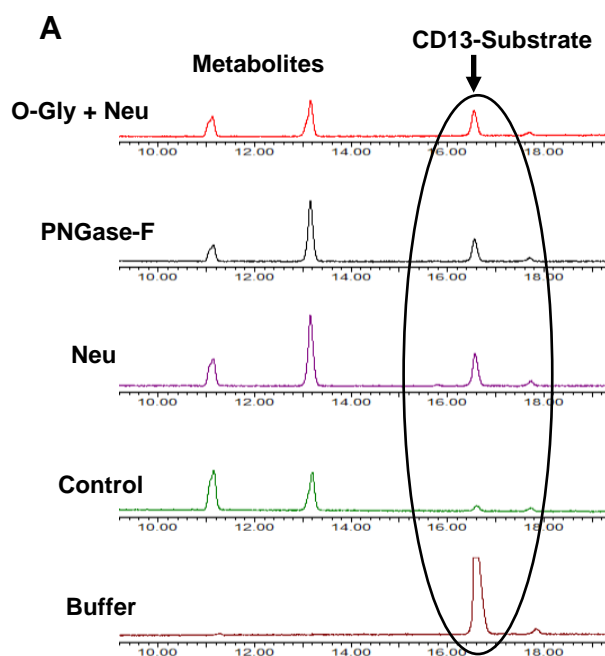

**Figure S5.** LC-MS spectra of CD13 substrate metabolism in MCF-7 CDX homogenate in the presence specific glycosidases.

**Table S1.** Lectins used in the study.

| <b>Lectin</b>                                                 | <b>Catalogue Number</b> |
|---------------------------------------------------------------|-------------------------|
| <b>Maackia Amurensis Lectin II (MAL II),<br/>Biotinylated</b> | B-1265-1                |
| <b>Sambucus Nigra Lectin (SNA), Biotinylated</b>              | B-1305-2                |
| <b>Peanut Agglutinin (PNA), Biotinylated</b>                  | B-1075-5                |
| <b>Soybean Agglutinin (SBA), Biotinylated</b>                 | B-1015-5                |
| <b>Aleuria Aurantia Lectin (AAL), Biotinylated</b>            | B-1395-1                |
| <b>Ulex Europaeus Agglutinin I (UEA I),<br/>Biotinylated</b>  | B-1065-2                |
